# Supplementary material
Source: MDPI journal article supplement (https://www.mdpi.com/2225-1146/10/1/10)
Supplement: s1 [file s1]

# Supplementary Material for 'Identification in Parametric Models: The Minimum Hellinger Distance Criterion

1st February 2022

David Pacini<sup>1</sup>

## Auxiliary Calculations

This Supplementary Material presents step-by-step calculations of the squared Hellinger distance in Examples 1–5.

Example 1. The squared Hellinger distance in this example is

$$\begin{aligned}\rho(\theta) &= 1 - \int f_{\theta}^{1/2} f_{\theta_o}^{1/2} d\mu = 1 - \int_{-\infty}^{+\infty} \left[ \frac{1}{\theta} 1(0 \leq y \leq \theta) \right]^{1/2} \left[ \frac{1}{\theta_o} 1(0 \leq y \leq \theta_o) \right]^{1/2} dy \\ &= 1 - \int_0^{\min(\theta, \theta_o)} \frac{1}{\theta^{1/2} \theta_o^{1/2}} dy = 1 - \frac{\min(\theta, \theta_o)}{\sqrt{\theta \theta_o}} = 1 - \frac{1}{2\sqrt{\theta \theta_o}} (\theta + \theta_o - |\theta - \theta_o|).\end{aligned}$$

Since  $\nabla \ln f_{\theta} = -\frac{d \ln \theta}{d\theta} = -\theta^{-1}$  for  $0 < y < \theta$ , the Fisher matrix is

$$\begin{aligned}\mathcal{I}(\theta) &= \int (\nabla \ln f_{\theta})^2 f_{\theta} d\mu - \left[ \int \nabla \ln f_{\theta} d\mu \right]^2 \\ &= \int_{-\infty}^{+\infty} \theta^{-2} \theta^{-1} 1(0 \leq y \leq \theta) dy - \left[ \int_{-\infty}^{+\infty} -\theta^{-1} \theta^{-1} 1(0 \leq y \leq \theta) dy \right]^2 = \theta^{-2} - \theta^{-2} = 0\end{aligned}$$

---

<sup>1</sup>David.Pacini@bristol.ac.uk

Example 2. The squared Hellinger distance in this example is

$$\begin{aligned}
\rho(\theta) &= 1 - \int f_\theta^{1/2} f_{\theta_o}^{1/2} d\mu \\
&= 1 - \int_{-\infty}^{+\infty} \left[ \frac{m}{\theta} \exp\left(\frac{m}{m-1} - \frac{m}{\theta} y\right) 1\left(y \geq \frac{\theta}{m-1}\right) \right]^{1/2} \left[ \frac{m}{\theta_o} \exp\left(\frac{m}{m-1} - \frac{m}{\theta_o} y\right) 1\left(y \geq \frac{\theta_o}{m-1}\right) \right]^{1/2} dy \\
&= 1 - \frac{m}{\sqrt{\theta\theta_o}} \int_{-\infty}^{+\infty} \left[ \exp\left(\frac{m}{m-1} - \frac{m}{\theta} y\right) \right]^{1/2} \left[ \exp\left(\frac{m}{m-1} - \frac{m}{\theta_o} y\right) \right]^{1/2} 1\left(y \geq \frac{\theta}{m-1}\right) 1\left(y \geq \frac{\theta_o}{m-1}\right) dy \\
&= 1 - \frac{m}{\sqrt{\theta\theta_o}} \int_{\frac{\max(\theta, \theta_o)}{m-1}}^{\infty} \exp\left(\frac{m}{m-1} - \frac{(\theta + \theta_o)}{2\theta\theta_o} my\right) dy \\
&= 1 - \frac{m}{\sqrt{\theta\theta_o}} \left[ -\frac{2\theta\theta_o}{(\theta + \theta_o)m} \exp\left(\frac{m}{m-1} - \frac{(\theta + \theta_o)}{2\theta\theta_o} my\right) \right]_{y=\frac{\max(\theta, \theta_o)}{m-1}}^{y=\infty} \\
&= 1 - \frac{m}{\sqrt{\theta\theta_o}} \frac{2\theta\theta_o}{(\theta + \theta_o)m} \left[ \exp\left(\frac{m}{m-1} - \frac{(\theta + \theta_o)}{2\theta\theta_o} m \frac{\max(\theta, \theta_o)}{m-1}\right) \right] \\
&= 1 - \frac{2\sqrt{\theta\theta_o}}{(\theta + \theta_o)} \exp\left(1 - \frac{(\theta + \theta_o)}{2\theta\theta_o} \max(\theta, \theta_o)\right)^{\frac{m}{m-1}} \\
&= 1 - \frac{2\sqrt{\theta\theta_o}}{(\theta + \theta_o)} \exp\left(1 - \frac{(\theta + \theta_o)^2 + (\theta + \theta_o)|\theta - \theta_o|}{4\theta\theta_o}\right)^{\frac{m}{m-1}}
\end{aligned}$$

Since  $\nabla \ln f_\theta = -m/\theta$  for  $y > \theta/(m-1)$ , the Fisher matrix is

$$\begin{aligned}
\mathcal{I}(\theta) &= \int (\nabla \ln f_\theta)^2 f_{\theta_o} d\mu - \left[ \int \nabla \ln f_\theta f_{\theta_o} d\mu \right]^2 \\
&= \int_{y \geq \theta/(m-1)}^{+\infty} \left( -\frac{m}{\theta} \right)^2 f_{\theta_o}(y) dy - \left[ \int_{y \geq \theta/(m-1)}^{+\infty} -\frac{m}{\theta} f_{\theta_o} d\mu \right]^2 = \left( \frac{m}{\theta} \right)^2 - \left( \frac{m}{\theta} \right)^2 = 0
\end{aligned}$$

Example 3. The squared Hellinger distance in this example is

$$\begin{aligned}
\rho(\theta) &= 1 - \int f_{\theta}^{1/2} f_{\theta_o}^{1/2} d\mu \\
&= 1 - \int_{-\infty}^{+\infty} \left[ (\sqrt{2\pi})^{-1} \exp \left[ - (y - \theta^2)^2 / 2 \right] \right]^{1/2} \left[ (\sqrt{2\pi})^{-1} \exp \left[ - (y - \theta_o^2)^2 / 2 \right] \right]^{1/2} dy \\
&= 1 - (\sqrt{2\pi})^{-1} \int_{-\infty}^{+\infty} \exp \left[ - (y - \theta^2)^2 / 2 \right]^{1/2} \exp \left[ - (y - \theta_o^2)^2 / 2 \right]^{1/2} dy \\
&= 1 - (\sqrt{2\pi})^{-1} \int_{-\infty}^{+\infty} \exp \left[ - (y - \theta^2)^2 / 4 \right] \exp \left[ - (y - \theta_o^2)^2 / 4 \right] dy \\
&= 1 - (\sqrt{2\pi})^{-1} \int_{-\infty}^{+\infty} \exp \left( \frac{-(y - \theta^2)^2 - (y - \theta_o^2)^2}{4} \right) dy \\
&= 1 - (\sqrt{2\pi})^{-1} \int_{-\infty}^{+\infty} \exp \left( \frac{-(y^2 + \theta^4 - 2\theta^2 y) - (y^2 + \theta_o^4 - 2\theta_o^2 y)}{4} \right) dy \\
&= 1 - (\sqrt{2\pi})^{-1} \int_{-\infty}^{+\infty} \exp \left( \frac{-(y^2 + \theta^4 - 2\theta^2 y) - (y^2 + \theta_o^4 - 2\theta_o^2 y)}{4} \right) dy \\
&= 1 - (\sqrt{2\pi})^{-1} \int_{-\infty}^{+\infty} \exp \left( -\frac{1}{2}y^2 + \frac{1}{2}(\theta^2 + \theta_o^2)y - \frac{(\theta^4 + \theta_o^4)}{4} \right) dy
\end{aligned}$$

Set  $a = -\frac{1}{2}$ ,  $b = \frac{1}{2}(\theta^2 + \theta_o^2)$ , and  $c = -\frac{(\theta^4 + \theta_o^4)}{4}$ . By completing the square

$$\begin{aligned}
\rho(\theta) &= 1 - (\sqrt{2\pi})^{-1} \int_{-\infty}^{+\infty} \exp (a(y + d)^2 + g) dy \\
&= 1 - \exp(g)(\sqrt{2\pi})^{-1} \int_{-\infty}^{+\infty} \exp (a(y + d)^2) dy.
\end{aligned}$$

where  $d = \frac{b}{2a}$  and  $g = c - \frac{b^2}{4a}$ . Developing

$$g = -\frac{(\theta^4 + \theta_o^4)}{4} - \frac{\left( \frac{1}{2}(\theta^2 + \theta_o^2) \right)^2}{4 \left( -\frac{1}{2} \right)} = -\frac{(\theta^2 - \theta_o^2)^2}{8}, \quad d = \frac{\frac{1}{2}(\theta^2 + \theta_o^2)}{2 \left( -\frac{1}{2} \right)} = -\frac{1}{2}(\theta^2 + \theta_o^2)$$

and then replacing

$$\begin{aligned}\rho(\theta) &= 1 - \exp\left(-\frac{(\theta^2 - \theta_o^2)^2}{8}\right) (\sqrt{2\pi})^{-1} \int_{-\infty}^{+\infty} \exp\left(-\frac{1}{2}\left(y - \frac{1}{2}(\theta^2 + \theta_o^2)\right)^2\right) dy \\ \rho(\theta) &= 1 - \exp\left(-\frac{(\theta^2 - \theta_o^2)^2}{8}\right),\end{aligned}$$

where for solving the integral one can use the change of variables  $x = y - b$  and  $z = x/\sqrt{2}$

$$\int_{-\infty}^{+\infty} \exp\left(-\frac{1}{2}(y - b)^2\right) dy = \int_{-\infty}^{+\infty} \exp(ax^2) dx = \sqrt{2} \int_{-\infty}^{+\infty} \exp(-z^2) dx = \sqrt{2}\sqrt{\pi}$$

and the Gaussian integral.

Since  $\nabla \ln f_\theta = (y - \theta^2)2\theta$ , the Fisher information is

$$\begin{aligned}\mathcal{I}(\theta) &= \int (\nabla \ln f_\theta)^2 f_{\theta_o} d\mu - \left[ \int \nabla \ln f_\theta f_{\theta_o} d\mu \right]^2 \\ &= \int_{-\infty}^{+\infty} 4\theta^2 (y - \theta^2)^2 f_{\theta_o}(y) dy - \left[ \int_{-\infty}^{+\infty} (y - \theta^2) 2\theta f_{\theta_o}(y) dy \right]^2 = 4\theta^2\end{aligned}$$

Example 4. For a step-by-step calculation of the squared Hellinger distance between multivariate normal distributions see e.g., Pardo (2005, p. 51). To verify that  $\arg \min_\theta \rho(\theta)$  is not a singleton, start by noticing that minimizing  $\rho(\theta)$  is equivalent to maximizing

$$\mu, \Omega \mapsto \alpha(\mu, \Omega) := -\frac{1}{4} \ln[\det(\Omega)] + \frac{1}{2} \ln \left[ \frac{1}{4} \det(\Omega + \Omega_o) \right] + \frac{1}{4} (\mu - \mu_o)' (\Omega + \Omega_o)^{-1} (\mu - \mu_o)$$

The first order condition for this maximization problem is

$$\begin{aligned}\frac{\partial \alpha(\mu, \Omega)}{\partial \mu} &= \frac{1}{2} (\Omega + \Omega_o)^{-1} (\mu - \mu_o) = 0 \\ \frac{\partial \alpha(\mu, \Omega)}{\partial \Omega} &= -\frac{adj(\Omega)}{4 \det(\Omega)} + \frac{adj(\Omega + \Omega_o)}{2 \det(\Omega + \Omega_o)} + \frac{1}{4} (\mu - \mu_o)' \frac{\partial (\Omega + \Omega_o)^{-1}}{\partial \Omega} (\mu - \mu_o) = 0.\end{aligned}$$

where we have used Jacobi's formula to express the derivative of the determinant of a matrix in terms of the adjugate of the matrix. Re-arranging the first equation in the last display yields  $\mu = \mu_o$ . Replacing in the second equation, one obtains

$$-\frac{\text{adj}(\Omega)}{2\det(\Omega)} + \frac{\text{adj}(\Omega + \Omega_o)}{\det(\Omega + \Omega_o)} = 0.$$

Since, for any matrix  $A$ ,  $\text{adj}(A) = \det(A)A^{-1}$ , one has

$$(\Omega + \Omega_o)^{-1} - \frac{1}{2}\Omega^{-1} = 0 \text{ and } \Omega(\Omega + \Omega_o)^{-1} - \frac{1}{2}I_2 = 0,$$

which shows that  $(\mu_o, \Omega_o)$  is not the only critical point of the function  $\mu, \Omega \mapsto \alpha(\mu, \Omega)$ .

Example 5. The squared Hellinger distance in this example is

$$\begin{aligned} \rho(\theta) &= 1 - \int f_\theta^{1/2} f_{\theta_o}^{1/2} d\mu \\ &= 1 - \int_{-\infty}^{+\infty} \left[ \frac{1}{2} \exp(-|y - \theta|) \right]^{1/2} \left[ \frac{1}{2} \exp(-|y - \theta_o|) \right]^{1/2} dy \\ &= 1 - \frac{1}{2} \int_{-\infty}^{+\infty} \exp \left( -\frac{1}{2}|y - \theta| - \frac{1}{2}|y - \theta_o| \right) dy \end{aligned}$$

Using the change of variable  $z = y - \theta$  and defining  $\delta = \theta - \theta_o$

$$\begin{aligned} \rho(\theta) &= 1 - \frac{1}{2} \int_{-\infty}^{+\infty} \exp \left( -\frac{1}{2}|z| - \frac{1}{2}|z + \delta| \right) dz = 1 - \frac{1}{2} \int_{-\infty}^{+\infty} \exp \left( -\frac{1}{2}[|z| + |z + \delta|] \right) dz \\ &= 1 - \frac{1}{2} \int_{\max(0, -\delta)}^{+\infty} \exp \left( -\frac{1}{2}(2z + \delta) \right) dz \\ &\quad - \frac{1(\delta < 0)}{2} \int_0^{-\delta} \exp \left( -\frac{1}{2}(-\delta) \right) dz - \frac{1(\delta > 0)}{2} \int_{-\delta}^0 \exp \left( -\frac{1}{2}(\delta) \right) dz \\ &\quad - \frac{1}{2} \int_{-\infty}^{\min(0, -\delta)} \exp \left( -\frac{1}{2}[-(2z + \delta)] \right) dz \end{aligned}$$

Solving each of the fourth integrals, we obtain:

$$\begin{aligned}\int_{\max(0, -\delta)}^{+\infty} \exp\left(-\frac{1}{2}(2z + \delta)\right) dz &= \left[-\exp\left(-z - \frac{\delta}{2}\right)\right]_{\max(0, -\delta)}^{+\infty} \\ &= -\left[-\exp\left(-\max(0, -\delta) - \frac{\delta}{2}\right)\right] = \exp\left(-\frac{|\delta|}{2}\right)\end{aligned}$$

$$1(\delta < 0) \int_0^{-\delta} \exp\left(-\frac{1}{2}(-\delta)\right) dz = 1(\delta < 0) \exp\left(\frac{\delta}{2}\right)(-\delta)$$

$$1(\delta > 0) \int_{-\delta}^0 \exp\left(-\frac{1}{2}(\delta)\right) dz = 1(\delta > 0) \exp\left(-\frac{\delta}{2}\right)\delta$$

$$\begin{aligned}\int_{-\infty}^{\min(0, -\delta)} \exp\left(-\frac{1}{2}[-(2z + \delta)]\right) dz &= \left[\exp\left(z + \frac{\delta}{2}\right)\right]_{-\infty}^{\min(0, -\delta)} \\ &= \exp\left(\min(0, -\delta) + \frac{\delta}{2}\right) = \exp\left(-\frac{|\delta|}{2}\right)\end{aligned}$$

Replacing back in the squared Hellinger distance

$$\begin{aligned}\rho(\theta) &= 1 - \frac{1}{2} \exp\left(-\frac{|\delta|}{2}\right) - \frac{1(\delta < 0)}{2} \exp\left(\frac{\delta}{2}\right)(-\delta) - \frac{1(\delta > 0)}{2} \exp\left(-\frac{\delta}{2}\right)\delta - \frac{1}{2} \exp\left(-\frac{|\delta|}{2}\right) \\ &= 1 - \exp\left(-\frac{|\delta|}{2}\right) - \frac{\delta}{2} \left[1(\delta > 0) \exp\left(-\frac{\delta}{2}\right) - 1(\delta < 0) \exp\left(\frac{\delta}{2}\right)\right]\end{aligned}$$

To calculate the Fisher matrix, one has  $\ln f_\theta(y) = \ln(1/2) - |y - \theta|$  and then

$$\begin{aligned}
\mathcal{I}(\theta) &= \int (\nabla \ln f_\theta)^2 f_{\theta_o} d\mu - \left[ \int \nabla \ln f_\theta f_{\theta_o} d\mu \right]^2 \\
&= \int_{-\infty}^0 (-1)^2 f_{\theta_o}(y) dy + \int_0^{+\infty} (1)^2 f_{\theta_o}(y) dy - \left[ \int_{-\infty}^0 (-1) f_{\theta_o}(y) dy + - \int_0^{+\infty} (1) f_{\theta_o}(y) dy \right]^2 \\
&= \int_{-\infty}^{\infty} f_{\theta_o}(y) dy = \int_{-\infty}^0 \frac{1}{2} \exp[(y - \theta)] dy + \int_0^{+\infty} \frac{1}{2} \exp[-(y - \theta)] dy = 1
\end{aligned}$$
